# Supplementary material
Source: PubMed Central journal article supplement (PMC2738284)
Supplement: supp_29_18_5193__1.pdf [file supp_29_18_5193__1.pdf]

## SUPPLEMENTAL MATERIALS

### SUPPLEMENTAL RESULTS

Since the kinase domain of Tel1p is adjacent to its C-terminus, previous groups have placed an epitope tag near the N-terminus or internally to examine the Tel1p kinase function (1, 2). However, in our hands, both of these previously published tagged *TELI* alleles (1, 2) result in short telomeres (data not shown), suggesting that the epitope tags compromised the functions of Tel1p. In an effort to generate a tagged and functional Tel1p, we inserted 1, 2, or 3 copies of the FLAG tag at the N-terminus of Tel1p at its native chromosomal locus. While *1FLAG-* and *2FLAG-TELI* resulted in wildtype telomere length when expressed from the *GALI* promoter or from the native *TELI* promoter (Figure S1 and 1B), *3FLAG-TELI* led to slightly shorter telomeres when over-expressed (Figure S1). Since 2FLAG-Tel1p was functional and easier to detect by western blotting (data not shown), we used this version for further studies.

### SUPPLEMENTAL REFERENCES

1. **Mallory, J. C., and T. D. Petes.** 2000. Protein kinase activity of Tel1p and Mec1p, two *Saccharomyces cerevisiae* proteins related to the human ATM protein kinase. *Proc Natl Acad Sci U S A* **97**:13749-54.
2. **Takata, H., Y. Kanoh, N. Gunge, K. Shirahige, and A. Matsuura.** 2004. Reciprocal association of the budding yeast ATM-related proteins Tel1 and Mec1 with telomeres in vivo. *Mol Cell* **14**:515-22.

**Supplemental Table 1. Yeast strains.**

| Strain name | Genotype                                                                                                                                                                                        |
|-------------|-------------------------------------------------------------------------------------------------------------------------------------------------------------------------------------------------|
| JHUY761     | <i>his3Δ1/his3Δ1 leu2Δ0/leu2Δ0 lys2Δ0/lys2Δ0 met15Δ0/met15Δ0 trp1Δ63/trp1Δ63 ura3Δ0/ura3Δ0</i>                                                                                                  |
| JHUY817     | JHUY761 <i>TEL1/tellΔ::hygroMX4 MEC1/mec1Δ::kanMX4 SML1/sml1Δ::TRP1</i>                                                                                                                         |
| JHUY870     | <i>his3Δ1/his3Δ1 leu2Δ0/leu2Δ0 LYS2/lys2Δ0 MET15/met15Δ0 ura3Δ0/ura3Δ0 XRS2/xrs2Δ::kanMX4</i>                                                                                                   |
| JHUY877     | <i>mat a-inc/mat α ade2-101/ade2-101 his3-200/his3-200 lys2-801/lys2-801 trp1Δ63/trp1Δ63 ura3-52/ura3-52 leu2Δ1::LEU2-GAL-HO/leu2Δ1 VII-L::ADE2-TG(1-3)-HO site-LYS2 RAD52/rad52Δ::hygroMX4</i> |
| yYM21       | JHUY761 <i>TEL1/tellΔ::kanMX6-P<sub>GALI</sub>-1FLAG-TEL1</i>                                                                                                                                   |
| yYM23       | <i>his3Δ1 leu2Δ0 lys2Δ0 met15Δ0 trp1Δ63 ura3Δ0 tellΔ::kanMX6-P<sub>GALI</sub>-1FLAG-TEL1</i>                                                                                                    |
| yYM25       | JHUY761 <i>TEL1/tellΔ::kanMX6-P<sub>GALI</sub>-2FLAG-TEL1</i>                                                                                                                                   |
| yYM27       | <i>his3Δ1 leu2Δ0 lys2Δ0 met15Δ0 trp1Δ63 ura3Δ0 tellΔ::kanMX6-P<sub>GALI</sub>-2FLAG-TEL1</i>                                                                                                    |
| yYM28       | JHUY761 <i>TEL1/tellΔ::kanMX6-P<sub>GALI</sub>-3FLAG-TEL1</i>                                                                                                                                   |
| yYM94       | <i>his3Δ1 leu2Δ0 lys2Δ0 met15Δ0 trp1Δ63 ura3Δ0 tellΔ::kanMX6-P<sub>GALI</sub>-2FLAG-tell-D2612A</i>                                                                                             |
| yYM97       | <i>his3Δ1 leu2Δ0 lys2Δ0 met15Δ0 trp1Δ63 ura3Δ0 tellΔ::kanMX6-P<sub>GALI</sub>-2FLAG-tell-N2617A</i>                                                                                             |
| yYM100      | <i>his3Δ1 leu2Δ0 lys2Δ0 met15Δ0 trp1Δ63 ura3Δ0 tellΔ::kanMX6-P<sub>GALI</sub>-2FLAG-tell-D2631A</i>                                                                                             |
| yYM103      | <i>his3Δ1 leu2Δ0 lys2Δ0 met15Δ0 trp1Δ63 ura3Δ0 tellΔ::kanMX6-P<sub>GALI</sub>-2FLAG-tell-D2612A/N2617A</i>                                                                                      |
| yYM147      | JHUY761 <i>TEL1/tellΔ::kanMX6-P<sub>GALI</sub>-2FLAG-tell-D2612A MEC1/mec1Δ::LEU2 SML1/sml1Δ::TRP1</i>                                                                                          |
| yYM149      | JHUY761 <i>TEL1/tellΔ::kanMX6-P<sub>GALI</sub>-2FLAG-tell-N2617A MEC1/mec1Δ::LEU2 SML1/sml1Δ::TRP1</i>                                                                                          |
| yYM151      | JHUY761 <i>TEL1/tellΔ::kanMX6-P<sub>GALI</sub>-2FLAG-tell-D2631A MEC1/mec1Δ::LEU2 SML1/sml1Δ::TRP1</i>                                                                                          |
| yYM153      | JHUY761 <i>TEL1/tellΔ::kanMX6-P<sub>GALI</sub>-2FLAG-tell-D2612A/N2617A MEC1/mec1Δ::LEU2 SML1/sml1Δ::TRP1</i>                                                                                   |
| yYM159      | <i>mat a-inc ade2-101 his3-200 lys2-801 trp1Δ63 ura3-52 leu2Δ1::LEU2-GAL-HO VII-L::ADE2-TG(1-3)-HO site-LYS2 rad52Δ::hygroMX4 tellΔ::kanMX4</i>                                                 |
| yYM167      | JHUY761 <i>TEL1/tellΔ::kanMX6-P<sub>GALI</sub>-2FLAG-TEL1 MEC1/mec1Δ::LEU2 SML1/sml1Δ::TRP1</i>                                                                                                 |
| yYM188      | <i>his3Δ1 leu2Δ0 lys2Δ0 met15Δ0 trp1Δ63 ura3Δ0 tellΔ::2FLAG-TEL1</i>                                                                                                                            |
| yYM242      | JHUY761 <i>TEL1/tellΔ::2FLAG-TEL1 MEC1/mec1Δ::LEU2 SML1/sml1Δ::TRP1</i>                                                                                                                         |
| yYM244      | JHUY761 <i>TEL1/tellΔ::2FLAG-tell-D2612A MEC1/mec1Δ::LEU2 SML1/sml1Δ::TRP1</i>                                                                                                                  |
| yYM246      | JHUY761 <i>TEL1/tellΔ::2FLAG-tell-N2617A MEC1/mec1Δ::LEU2 SML1/sml1Δ::TRP1</i>                                                                                                                  |
| yYM248      | JHUY761 <i>TEL1/tellΔ::2FLAG-tell-D2631A MEC1/mec1Δ::LEU2 SML1/sml1Δ::TRP1</i>                                                                                                                  |

|             |                                                                                                            |
|-------------|------------------------------------------------------------------------------------------------------------|
| yYM250      | JHUY761 <i>TEL1/tel1Δ::2FLAG-tel1-D2612A/N2617A MEC1/mec1Δ::LEU2 SML1/sml1Δ::TRP1</i>                      |
| yYM256      | JHUY761 <i>TEL1/tel1Δ::2FLAG-TEL1 XRS2/xrs2Δ::XRS2-13myc-kanMX6</i>                                        |
| yYM259      | JHUY761 <i>TEL1/tel1Δ::2FLAG-TEL1 XRS2/xrs2Δ::XRS2-13myc-kanMX6</i>                                        |
| yYM260      | JHUY761 <i>TEL1/tel1Δ::2FLAG-TEL1 XRS2/xrs2Δ::XRS2-13myc-kanMX6 YKU80/yku80Δ::URA3</i>                     |
| yYM268, 269 | JHUY761 <i>TEL1/tel1Δ::2FLAG-TEL1 XRS2/xrs2Δ::xrs2-834-13myc-kanMX6</i>                                    |
| yYM271      | JHUY761 <i>TEL1/tel1Δ::2FLAG-TEL1 XRS2/xrs2Δ::xrs2-D838A/D839A-13myc-kanMX6</i>                            |
| yYM273      | JHUY761 <i>TEL1/tel1Δ::2FLAG-TEL1 XRS2/xrs2Δ::xrs2-D842A/D843A-13myc-kanMX6</i>                            |
| yYM274, 275 | JHUY761 <i>TEL1/tel1Δ::2FLAG-TEL1 XRS2/xrs2Δ::xrs2-K846A/F847A-13myc-kanMX6</i>                            |
| yYM278      | JHUY877 <i>TEL1/tel1Δ::2FLAG-TEL1 pRS416</i>                                                               |
| yYM279      | JHUY877 <i>TEL1/tel1Δ::2FLAG-tel1-D2612A pRS416</i>                                                        |
| yYM280      | JHUY877 <i>TEL1/tel1Δ::2FLAG-tel1-N2617A pRS416</i>                                                        |
| yYM281      | JHUY877 <i>TEL1/tel1Δ::2FLAG-tel1-D2631A pRS416</i>                                                        |
| yYM282      | JHUY877 <i>TEL1/tel1Δ::2FLAG-tel1-D2612A/N2617A pRS416</i>                                                 |
| yYM286      | JHUY877 <i>XRS2/xrs2Δ::XRS2-13myc-kanMX6</i>                                                               |
| yYM288      | JHUY877 <i>XRS2/xrs2Δ::xrs2-834-13myc-kanMX6</i>                                                           |
| yYM289      | JHUY877 <i>XRS2/xrs2Δ::xrs2-D838A/839A-13myc-kanMX6</i>                                                    |
| yYM292      | JHUY877 <i>XRS2/xrs2Δ::xrs2-D842A/843A-13myc-kanMX6</i>                                                    |
| yYM293      | JHUY877 <i>XRS2/xrs2Δ::xrs2-K846A/F847A-13myc-kanMX6</i>                                                   |
| yYM300      | JHUY877 <i>TEL1/ tel1Δ::2FLAG-TEL1 XRS2/xrs2Δ::xrs2-834-13myc-kanMX6</i>                                   |
| yYM301      | JHUY877 <i>TEL1/ tel1Δ::2FLAG-TEL1 XRS2/xrs2Δ::xrs2-K846A/F847A-13myc-kanMX6</i>                           |
| yYM305      | JHUY877 <i>TEL1/ tel1Δ::2FLAG-tel1-D2612A/N2617A XRS2/xrs2Δ::xrs2-K846A/F847A-13myc-kanMX6</i>             |
| yYM308      | JHUY877 <i>TEL1/ tel1Δ::2FLAG-tel1-D2612A/N2617A XRS2/xrs2Δ::xrs2-834-13myc-kanMX6</i>                     |
| yYM309, 310 | JHUY761 <i>TEL1/tel1Δ::2FLAG-tel1-D2612A/N2617A XRS2/xrs2Δ::XRS2-13myc-kanMX6</i>                          |
| yYM311, 312 | JHUY761 <i>TEL1/tel1Δ::2FLAG-tel1-D2612A/N2617A XRS2/xrs2Δ::xrs2-834-13myc-kanMX6</i>                      |
| yYM319      | JHUY877 <i>TEL1/ tel1Δ::2FLAG-TEL1 XRS2/xrs2Δ::XRS2-13myc-kanMX6</i>                                       |
| yYM321      | JHUY877 <i>TEL1/ tel1Δ::2FLAG-tel1-D2612A/N2617A XRS2/xrs2Δ::XRS2-13myc-kanMX6</i>                         |
| yYM324      | JHUY877 <i>TEL1/tel1Δ::HIS3 XRS2/xrs2Δ::XRS2-13myc-kanMX6</i>                                              |
| yYM325, 326 | JHUY761 <i>TEL1/tel1Δ::2FLAG-tel1-D2612A/N2617A XRS2/xrs2Δ::xrs2-K846A/F847A-13myc-kanMX6</i>              |
| yYM327, 328 | JHUY761 <i>TEL1/tel1Δ::kanMX6-PGAL1-2FLAG-tel1-D2612A/N2617A XRS2/xrs2Δ::xrs2-834-13myc-kanMX6</i>         |
| yYM329, 330 | JHUY761 <i>TEL1/tel1Δ::kanMX6-PGAL1-2FLAG-tel1-D2612A/N2617A XRS2/xrs2Δ::xrs2-K846A/F847A-13myc-kanMX6</i> |
| yYM331      | JHUY761 <i>TEL1/tel1Δ::HygroMX4 MEC1/mec1Δ::LEU2 SML1/sml1Δ::TRP1</i>                                      |

|             |                                                                   |
|-------------|-------------------------------------------------------------------|
|             | <i>RAD52/rad52Δ::kanMX4</i>                                       |
| yYM333, 334 | JHUY761 <i>TEL1/tel1Δ::HygroMX4 XRS2/xrs2Δ::XRS2-13myc-kanMX6</i> |
| yYM335, 336 | JHUY761 <i>TEL1/tel1Δ::2FLAG-TEL1 XRS2/xrs2Δ::kanMX4</i>          |

## SUPPLEMENTAL FIGURES

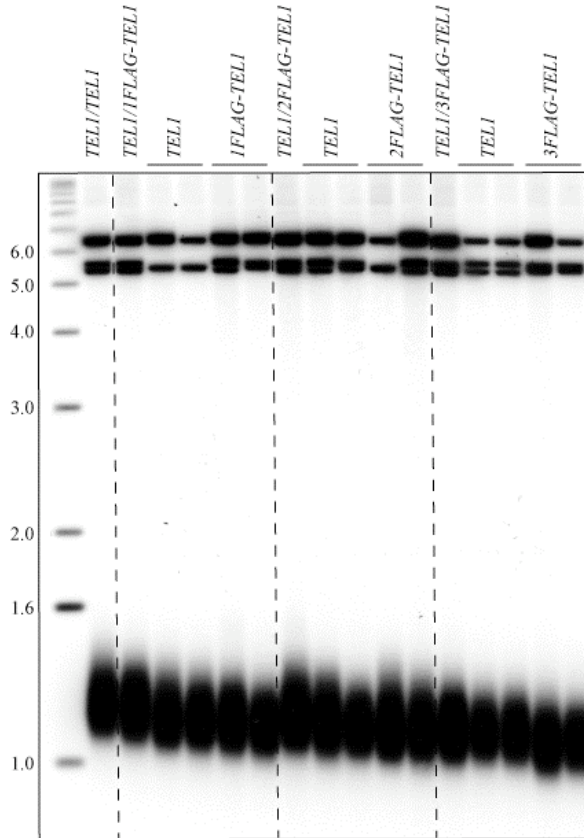

**Figure S1.** The effect of N-terminal FLAG tagging of *TEL1* on native telomere length. Southern blotting analysis of telomere length of haploid strains over-expressing 1, 2, or 3 copies of FLAG tagged *TEL1*. Wildtype (*TEL1/TEL1* JHUY761) and parental heterozygous diploid strains *TEL1/IFLAG-TEL1* (yYM21), *TEL1/2FLAG-TEL1* (yYM25), and *TEL1/3FLAG-TEL1* (yYM28) were included for comparison. The haploid strains were independent strains derived from yYM21, 25, and 28. The blot was probed with a subtelomeric Y' probe. Sizes of DNA markers (in kb) are indicated on the left.

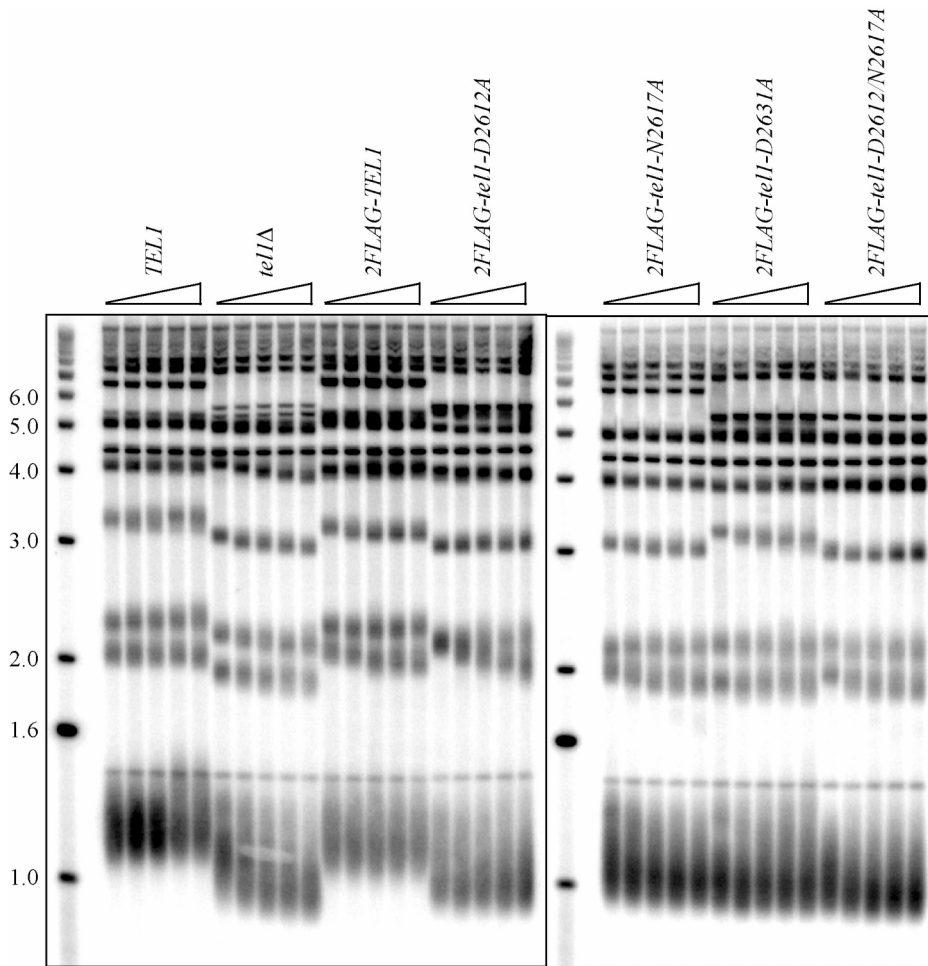

**Figure S2.** Southern blotting analysis of telomere length of strains with *TEL1* and *tell* alleles (parental strains are JHUY817, yYM242, 244, 246, 248, and 250). Cells were streaked on YPD plates from spore colonies every 48 hours. Genomic DNA was prepared from streaks # 1, 4, 7, 10, and 13 (symbolized by gradient triangles) and analyzed by Southern blotting. The blot was probed with a poly (dA-dC)•(dG-dT) probe. Sizes of DNA markers (in kb) are indicated on the left.

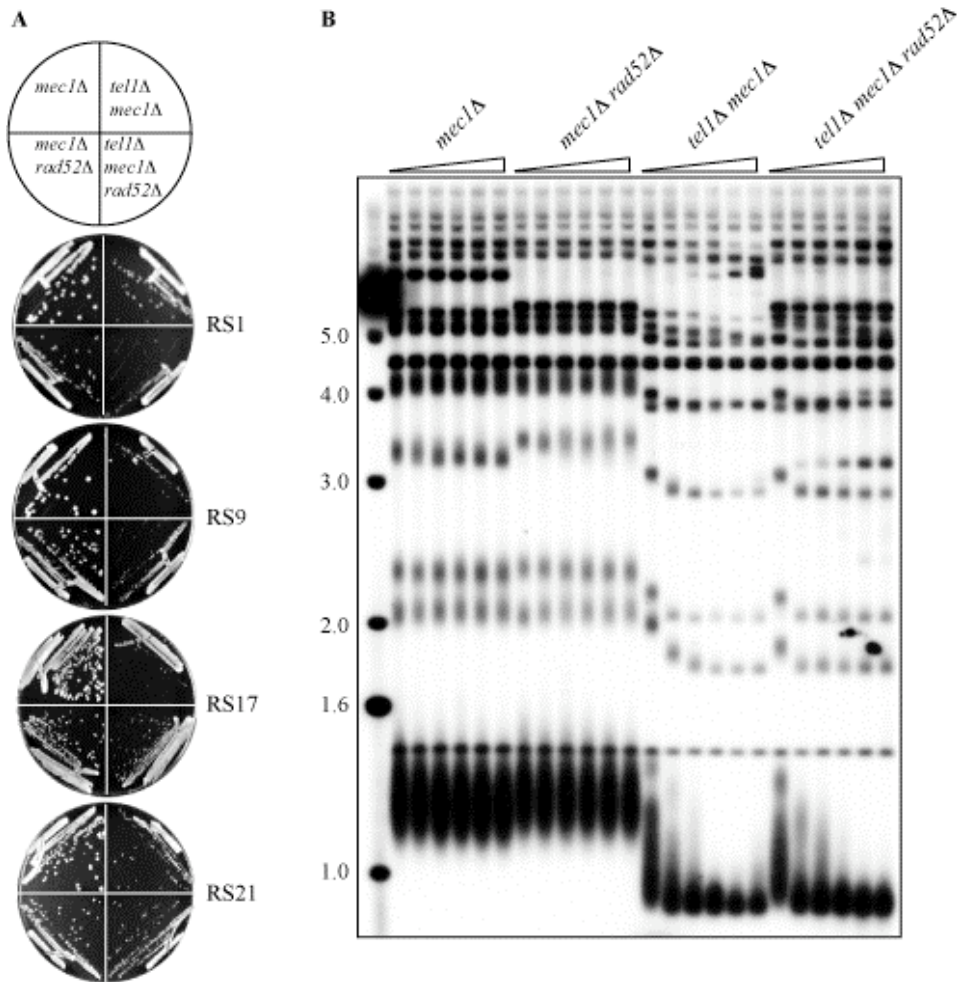

**Figure S3.** *tel1Δ mec1Δ* or *tel1Δ mec1Δ rad52Δ* strains do not seem to generate survivors. (A). Cells were streaked on YPD plates from spore colonies (dissected from yYM331) every 48 hours. Re-streak (RS) numbers are indicated. *SML1* is deleted (not labeled) from all the strains to rescue the *mec1Δ* lethality. (B). Genomic DNA was prepared from re-streaks # 1, 5, 9, 13, 17, and 21 (symbolized by gradient triangles) and analyzed by Southern blotting. The blot was probed with a poly (dA-dC)•(dG-dT) probe. Sizes of DNA markers (in kb) are indicated on the left.

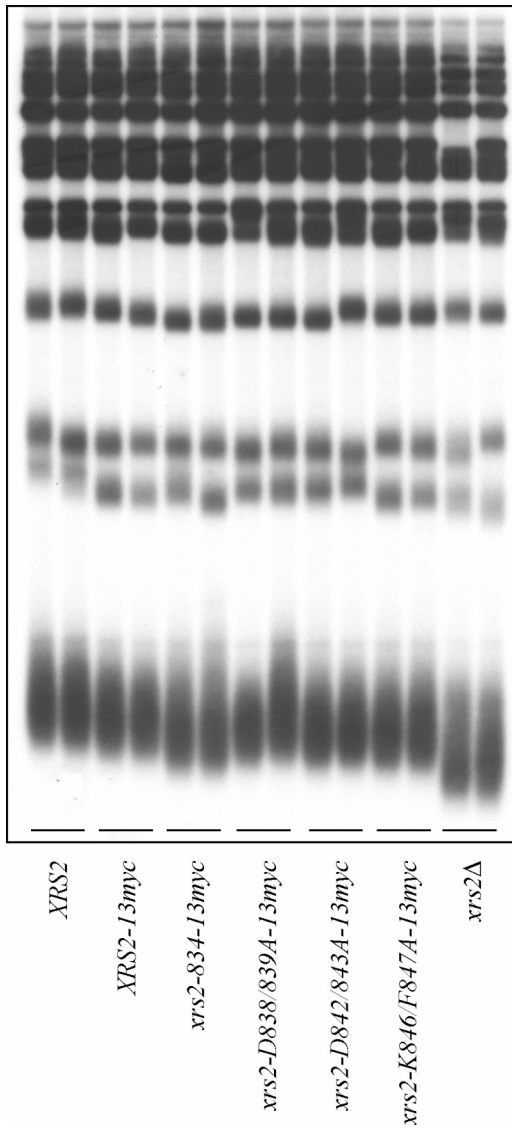

**Figure S4.** Southern blotting analysis of *xrs2* C-terminal mutants. Genomic DNA was prepared from untagged (*XRS2* and *xrs2Δ*) and tagged *XRS2* strains (derived from yYM259, 269, 271, 273, 274, and JHUY870). The blot was probed with a poly (dA-dC)•(dG-dT) probe.



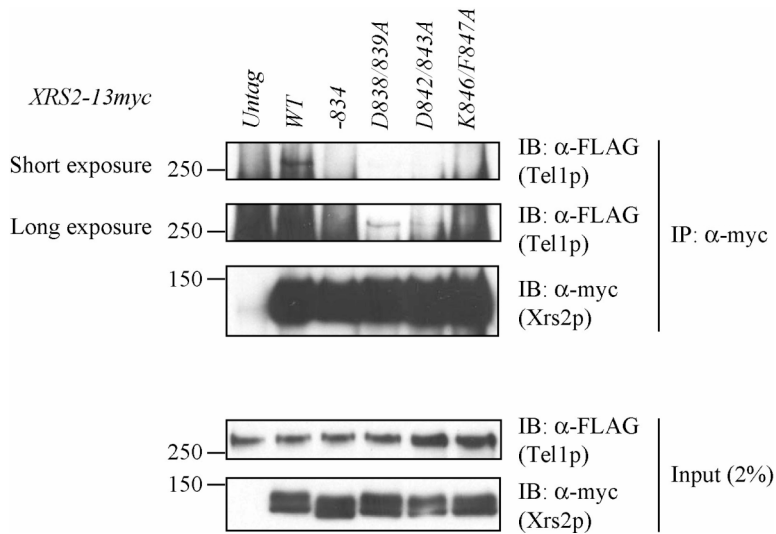

**Figure S5.** Xrs2p interacts with Tel1p via the C-terminal 20 amino acids of Xrs2p and residues K846 and F847 of Xrs2p are required. Strains expressing the indicated wildtype or mutant Xrs2p-13myc and 2FLAG-Tel1p (derived from yYM260, 269, 271, 273, and 274) were immunoprecipitated with an  $\alpha$ -myc antibody. 2% of the input material and the immunoprecipitate were examined by western blotting for Tel1p ( $\alpha$ -FLAG) and Xrs2p ( $\alpha$ -myc). For the detection of Tel1p in the immunoprecipitate, the short and long exposures of the same blot are shown.
